# Supplementary material
Source: PubMed Central journal article supplement (PMC6916127)
Supplement: Supp_Table1.pdf [file Supp_Table1.pdf]

## SUPPLEMENTARY DATA

SUPPLEMENTARY TABLE S1. HAZARD RATIOS FOR ALL-CAUSE, CARDIOVASCULAR, AND CANCER MORTALITY  
IN VERY HIGH UIC AFTER THE EXCLUSION OF PARTICIPANTS WITH UIC >1100  $\mu\text{g/L}$ <sup>a</sup>

|                          | <i>Event/total (%)</i> | <i>Unadjusted<br/>HR [CI]</i> | <i>Adjusted</i>                        |                                        |
|--------------------------|------------------------|-------------------------------|----------------------------------------|----------------------------------------|
|                          |                        |                               | <i>Model 1<sup>b</sup><br/>HR [CI]</i> | <i>Model 2<sup>c</sup><br/>HR [CI]</i> |
| All-cause mortality      | 250/845 (29.6)         | 1.37 [1.13–1.66]              | 1.26 [1.09–1.46]                       | 1.27 [1.08–1.44]                       |
| Cardiovascular mortality | 58/845 (6.9)           | 1.39 [1.00–1.91]              | 1.24 [0.95–2.61]                       | 1.20 [0.89–1.62]                       |
| Cancer mortality         | 68/845 (8.1)           | 1.55 [1.06–2.27]              | 1.42 [0.94–2.14]                       | 1.42 [0.95–2.09]                       |

<sup>a</sup>The reference is normal UIC.

<sup>b</sup>HR adjusted for age, sex, race/ethnicity, education status, and active smoking.

<sup>c</sup>HR adjusted for diabetes, hypertension, hypercholesterolemia, previous cardiovascular disease, previous cancer, BMI, and eGFR in addition to confounders in Model 1.
