# Supplementary material
Source: PubMed Central journal article supplement (PMC6916127)
Supplement: Supp_Table2.pdf [file Supp_Table2.pdf]

SUPPLEMENTARY TABLE S2. ASSOCIATIONS BETWEEN UIC GROUPS AND ALL-CAUSE, CARDIOVASCULAR, AND CANCER MORTALITY IN THE NHANES III AFTER FURTHER ADJUSTMENT FOR TOTAL SODIUM INTAKE AND FAT/CALORIE RATIO<sup>a,b</sup>

|                          | <i>Very low UIC</i> | <i>Low UIC</i>   | <i>Normal UIC<br/>(reference)</i> | <i>High UIC</i>  | <i>Very high UIC</i> |
|--------------------------|---------------------|------------------|-----------------------------------|------------------|----------------------|
| All-cause mortality      | 0.94 [0.77–1.14]    | 0.95 [0.84–1.09] | 1                                 | 0.92 [0.68–1.23] | 1.21 [1.05–1.39]     |
| Cardiovascular mortality | 0.84 [0.63–1.12]    | 0.86 [0.68–1.07] | 1                                 | 0.72 [0.40–1.29] | 1.11 [0.84–1.48]     |
| Cancer mortality         | 1.38 [0.96–2.00]    | 1.15 [0.88–1.51] | 1                                 | 1.14 [0.71–1.85] | 1.48 [0.99–2.20]     |

<sup>a</sup>The reference is the normal UIC group.

<sup>b</sup>HR adjusted for age, sex, race/ethnicity, education status, active smoking, diabetes, hypertension, hypercholesterolemia, previous cardiovascular disease, previous cancer, BMI, eGFR, total sodium intake (quintiles), and fat/calorie ratio (quintiles).
